# Supplementary material
Source: PubMed Central journal article supplement (PMC1602024)
Supplement: bmj_38950.561400.55_1.pdf [file bmj_38950.561400.55_1.pdf]

<sup>f</sup> Reference list for included studies

- W1. Bonjour JP, Carrie AL, Clavien H, Ferrari S, Slosman D, Theintz G, Rizzoli R. Calcium-fortified aliments selectively increase radial and femoral bone mass in prepubertal girls: a double-blind randomized trial. *J Bone Miner Res* 1995;10S:S152.
- W2. Bonjour JP, Carrie AL, Ferrari S, Clavien H, Slosman D, Theintz G, et al. Calcium-enriched foods and bone mass growth in prepubertal girls: a randomized, double-blind, placebo-controlled trial. *J Clin Invest* 1997;99:1287-1294.
- W3. Bonjour JP, Chevalley T, Ammann P, Slosman D, Rizzoli R. Gain in bone mineral mass in prepubertal girls 3.5 years after discontinuation of calcium supplementation: a follow-up study. *Lancet* 2001;358: 1208-1212.
- W4. Chevalley T, Bonjour JP, Hans D, Slosman D, Rizzoli R. Interdependence between calcium intake and menarcheal age on bone mass gain: a 8 years follow-up from prepuberty to post-menarche. *J Bone Miner Res* 2003;18:S33.
- W5. Chevalley T, Rizzoli R, Hans D, Ferrari S, Bonjour JP. Interaction between calcium intake and menarcheal age on bone mass gain: an eight-year follow-up study from prepuberty to postmenarche. *J Clin Endocrinol Metab* 2005;90(1):44-51.
- W6. Cameron MA, Paton LM, Nowson CA, Margerison C, Frame M, Wark JD. The effect of calcium supplementation on bone density in premenarcheal females: a co-twin approach. *J Clin Endocrinol Metab* 2004;89:4916-22.
- W7. Chevalley T, Bonjour JP, Ferrari S, Hans D, Rizzoli R. Skeletal site selectivity in the effects of calcium supplementation on areal bone mineral density gain: a randomized, double-blind, placebo-controlled trial in prepubertal boys. *J Clin Endocrinol Metab* 2005.

- W8. Courteix D, Jaffre C, Lespessailles E, Benhamou L. Cumulative effects of calcium supplementation and physical activity on bone accretion in premenarchal children: a double-blind randomised placebo-controlled trial. *Int J Sports Med* 2005;26: 332-8.
- W9. Dibba B, Prentice A, Ceesay M, Stirling DM, Cole TJ, Poskitt EM. Effect of calcium supplementation on bone mineral accretion in Gambian children accustomed to a low-calcium diet. *Am J Clin Nutr* 2000;71:544-9.
- W10. Dibba B, Prentice A, Ceesay M, Mendy M, Darboe S, Stirling DM, et al. Bone mineral contents and plasma osteocalcin concentrations of Gambian children 12 and 24 mo after the withdrawal of a calcium supplement. *Am J Clin Nutr* 2002;76:681-6.
- W11. Iuliano-Burns S, Saxon L, Naughton G, Gibbons K, Bass SL. Regional specificity of exercise and calcium during skeletal growth in girls: a randomized controlled trial. *J Bone Miner Res* 2003;18:156-162.
- W12. Johnston CC, Jr, Miller JZ, Slemenda CW, Reister TK, Hui S, Christian JC, Peacock M. Calcium supplementation and increases in bone mineral density in children. *N Engl J Med* 1992;327:82-87.
- W13. Slemenda CW, Reister TK, Peacock M, Johnston CC. Bone growth in children following the cessation of calcium supplementation. *J Bone Miner Res* 1993;8:S154.
- W14. Slemenda CW, Peacock M, Hui S, Zhou L, Johnston CC. Reduced rates of skeletal remodeling are associated with increased bone mineral density during the development of peak skeletal mass. *J Bone Miner Res* 1997;12:676-82.
- W15. Lee WTK, Leung SSF, Wang SH, Xu YC, Zeng WP, Lau J, et al. Double-blind, controlled calcium supplementation and bone mineral accretion in children accustomed to a low-calcium diet. *Am J Clin Nutr* 1994;60:744-750.

- W16. Lee WT, Leung SS, Leung DM, Wang SH, Xu YC, Zeng WP, et al. Bone mineral acquisition in low calcium intake children following the withdrawal of calcium supplement. *Acta Paediatr* 1997;86:570-6.
- W17. Lee WT, Leung SS, Leung DM, Tsang HS, Lau J, Cheng JC. A randomized double-blind controlled calcium supplementation trial, and bone and height acquisition in children. *Br J Nutr* 1995;74:125-139.
- W18. Lee WT, Leung SS, Leung DM, Cheng JC. A follow-up study on the effects of calcium-supplement withdrawal and puberty on bone acquisition of children. *Am J Clin Nutr* 1996;64:71-7.
- W19. Lloyd T, Andon MB, Rollings N, Martel JK, Landis JR, Demers LM, et al. Calcium supplementation and bone mineral density in adolescent girls. *JAMA* 1993;270:841-844.
- W20. Lloyd T, Rollings N, Chinchilli VM, Martel JK, Egli DF, Demers LM, et al. The effect of starting calcium supplementation at age 12 or at age 14 on bone acquisition in teenage girls. *J Bone Miner Res* 1995;10:S152.
- W21. Lloyd T, Martel JK, Rollings N, Andon MB, Kulin H, Demers LM, et al. The effect of calcium supplementation and Tanner Stage on bone density, content and area in teenage women. *Osteoporos Int* 1996;6:276-283.
- W22. Lloyd T, Rollings N, Andon MB, Egli DF, Mauger E, Chinchilli VM. Enhanced bone gain in early adolescence due to calcium supplementation does not persist in late adolescence. *J Bone Miner Res* 1996:S154.

- W23. Matkovic V, Badenhop-Stevens N, Landoll JD, Goel P, Li B. Long term effect of calcium supplementation and dairy products on bone mass of young females. *J Bone Miner Res* 2002:S172.
- W24. Landoll JD, Badenhop-Stevens NE, Ha E, Mobley SL, Clairmont A, Matkovic V. Forearm pQCT measurements in young adult women accustomed to different calcium intakes during adolescence. *J Bone Miner Res* 2003;18:S182.
- W25. Matkovic V, Landoll JD, Badenhop-Stevens NE, Ha EY, Crncevic-Orlic Z, Li B, et al. Nutrition influences skeletal development from childhood to adulthood: a study of hip, spine, and forearm in adolescent females. *J Nutr* 2004;134:701S-705S.
- W26. Matkovic V, Goel PK, Badenhop-Stevens NE, Landoll JD, Li B, Ilich JZ, et al. Calcium supplementation and bone mineral density in females from childhood to young adulthood: a randomized controlled trial. *Am J Clin Nutr* 2005;81(1):175-88.
- W27. Molgaard C, Thomsen BL, Michaelsen KF. Effect of habitual dietary calcium intake on calcium supplementation in 12-14-y-old girls. *Am J Clin Nutr* 2004;80(5):1422-7.
- W28. Nowson CA, Green RM, Hopper JL, Sherwin AJ, Young D, Kaymakci B, et al. A co-twin study of the effect of calcium supplementation on bone density during adolescence. *Osteoporos Int* 1997;7:219-25.
- W29. Prentice A, Ginty F, Stear SJ, Jones SC, Laskey MA, Cole TJ. Calcium supplementation increases stature and bone mineral mass of 16-18 year old boys. *J Clin Endocrinol Metab* 2005.
- W30. Rodda C, Urdampilleta M, Hu J, Strauss B, Briganti E, Gilfillan C. Ethnic differences in effect of calcium supplementation on bone density in peripubertal girls in a

double-blind, placebo-controlled randomised trial. *Australian and New Zealand Bone Mineral Society*

*2004 Annual Scientific Meeting Final Program and Abstract Book* 2004:50.

W31. Rozen GS, Rennert G, Dodiuk-Gad RP, Rennert HS, Ish-Shalom N, Diab G, et al. Calcium supplementation provides an extended window of opportunity for bone mass accretion after menarche. *Am J Clin Nutr* 2003;78:993-8.

W32. Dodiuk-Gad RP, Rozen GS, Rennert G, Rennert HS, Ish-Shalom S. Sustained effect of short-term calcium supplementation on bone mass in adolescent girls with low calcium intake. *Am J Clin Nutr* 2005;81(1):168-74.

W33. Specker B, Binkley T. Randomized trial of physical activity and calcium supplementation on bone mineral content in 3- to 5-year-old children. *J Bone Miner Res* 2003;18:885-92.

W34. Stear SJ, Prentice A, Jones SC, Cole, TJ. Effect of a calcium and exercise intervention on the bone mineral status of 16-18-y-old adolescent girls. *Am J Clin Nutr* 2003;77:985-992.

W35. Wang S, Xue Y, Li D, Shu S, Zhen W. Effect of calcium supplementation on bone mineral content in children accustomed to low calcium diet. *Acta Nutrimenta Sinica* 1996;18:97-102.

## Appendix 1: Search Strategy

For MEDLINE (OVID) the strategy used was:

1exp CALCIUM/

2exp Calcium, Dietary/

3calcium.tw.

4exp dairy products/

5dairy.tw.

6milk.tw.

7exp dietary supplements/

8or/1-7

9exp OSTEOPOROSIS/

10osteoporos\$.tw.

11exp Bone Density/

12(bone adj2 loss).tw.

13(bone adj2 densit\$).tw.

14bone mass.tw.

15bmd.tw.

16or/9-15

178 and 16

18limit 17 to all child <0 to 18 years>

The Dickersin filter for randomised controlled trials was applied to Medline, and adapted for other databases where relevant (Dickersin K, Scherer R, Lefebvre C. Identifying relevant studies for systematic reviews. *BMJ* 1994;309:1286-91).
